# Supplementary material for: Disposable gold nanoparticle functionalized and bare screen-printed electrodes for potentiometric determination of trazodone hydrochloride in pure form and pharmaceutical preparations
Source: Royal Society of Chemistry journal article supplement (doi:10.1039/c8ra00745d), 2018-01-01
Supplement: c8ra00745d1.pdf [file c8ra00745d1.pdf]

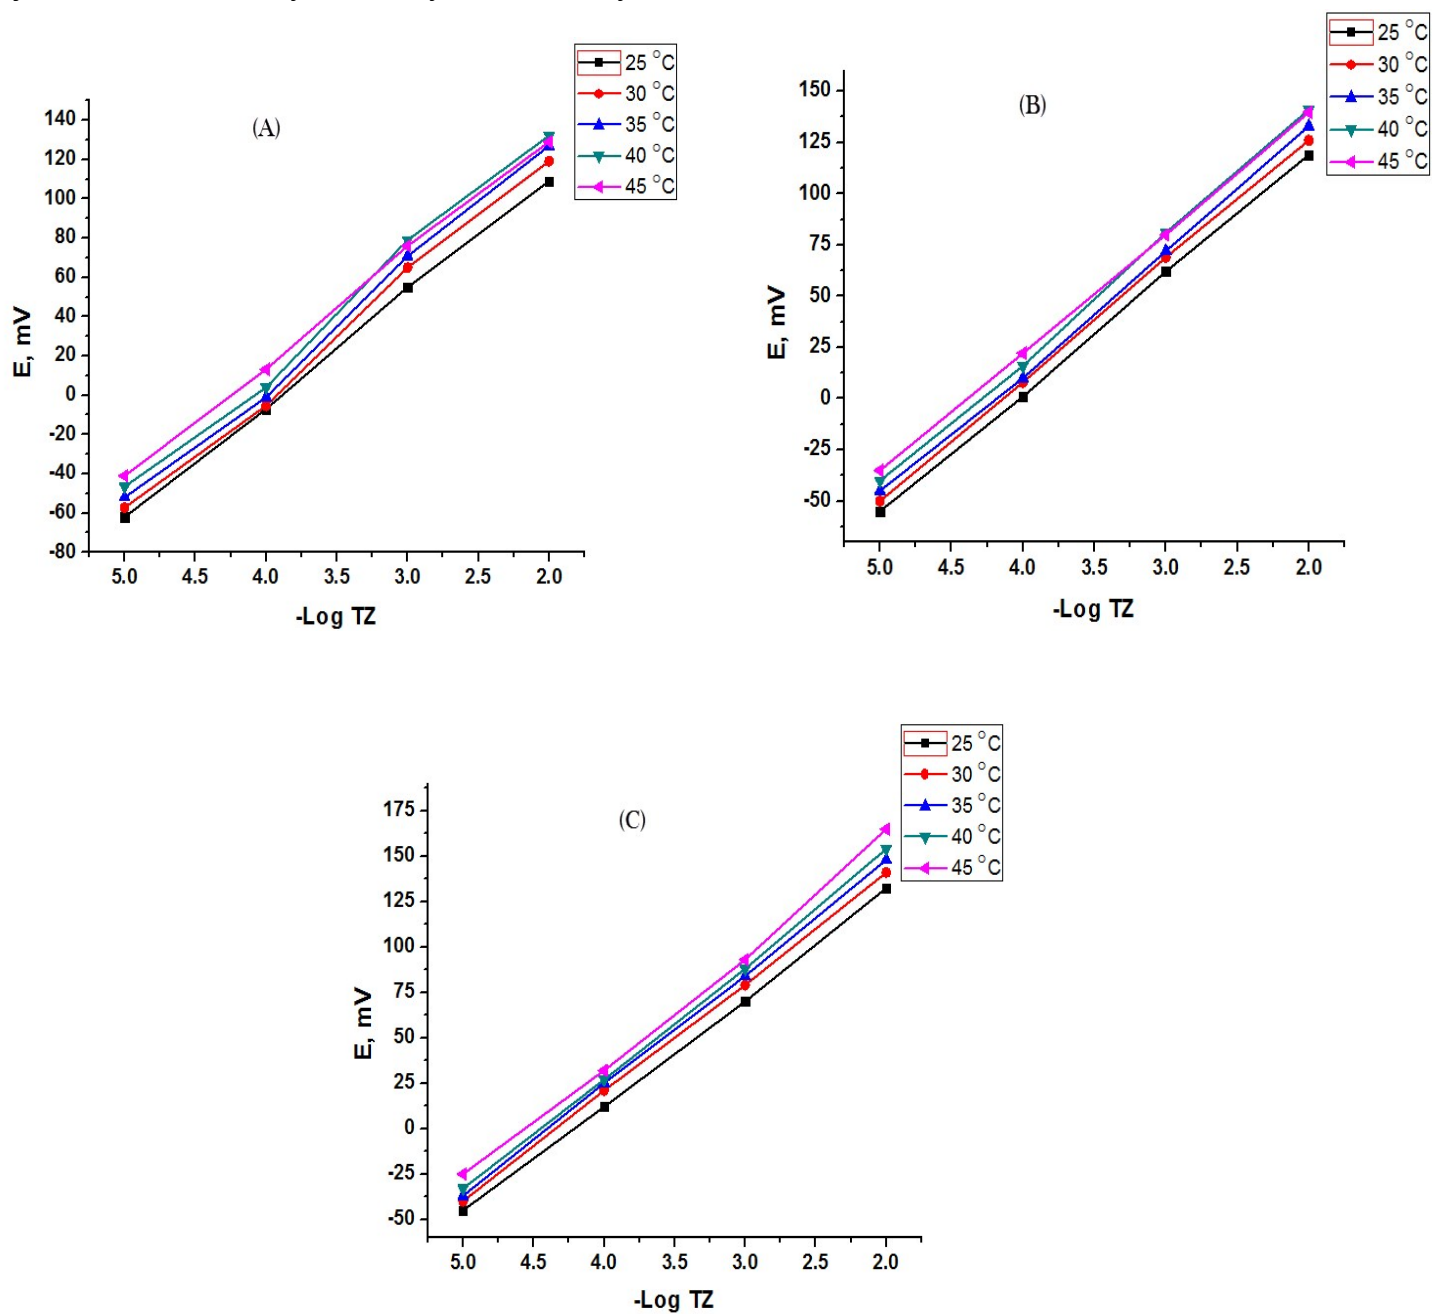

Figure (S1) calibration curves of A) sensor 1 B) sensor 2 and C) sensor 3 at different temperatures.

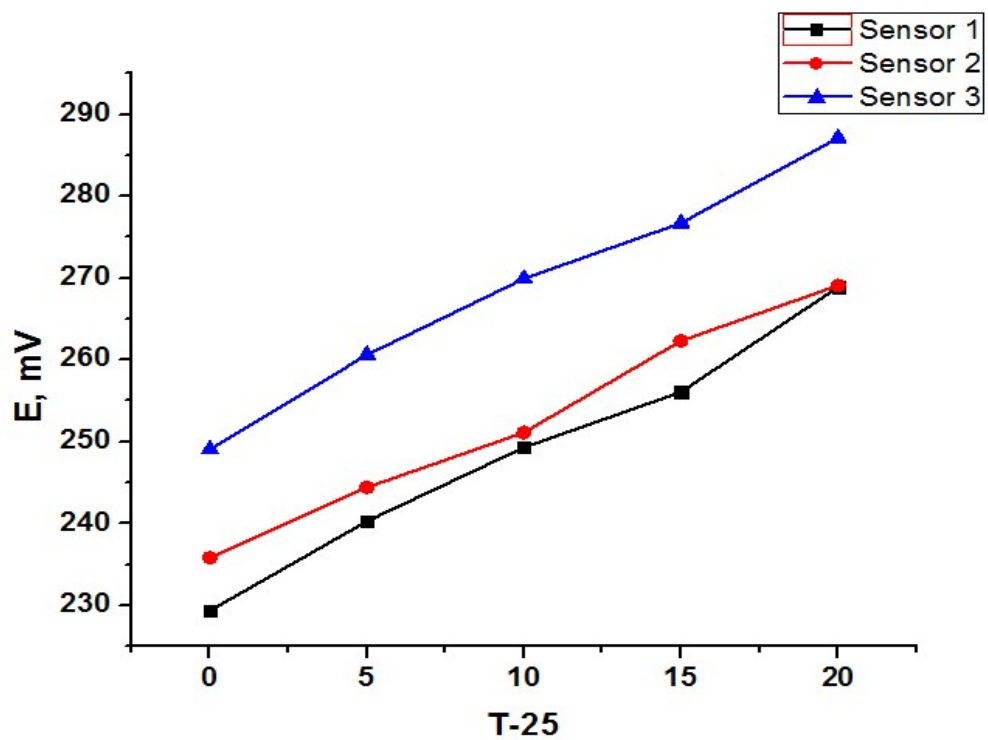

Figure (S2): Variation of standard electrode potential with changes of test solution temperatures for different SPEs.
